# Supplementary material
Source: PubMed Central journal article supplement (PMC7541444)

**Supplemental Figure e1:** Flow of survey respondents and practices in analysis from baseline (0 months) to follow-up (12 months).

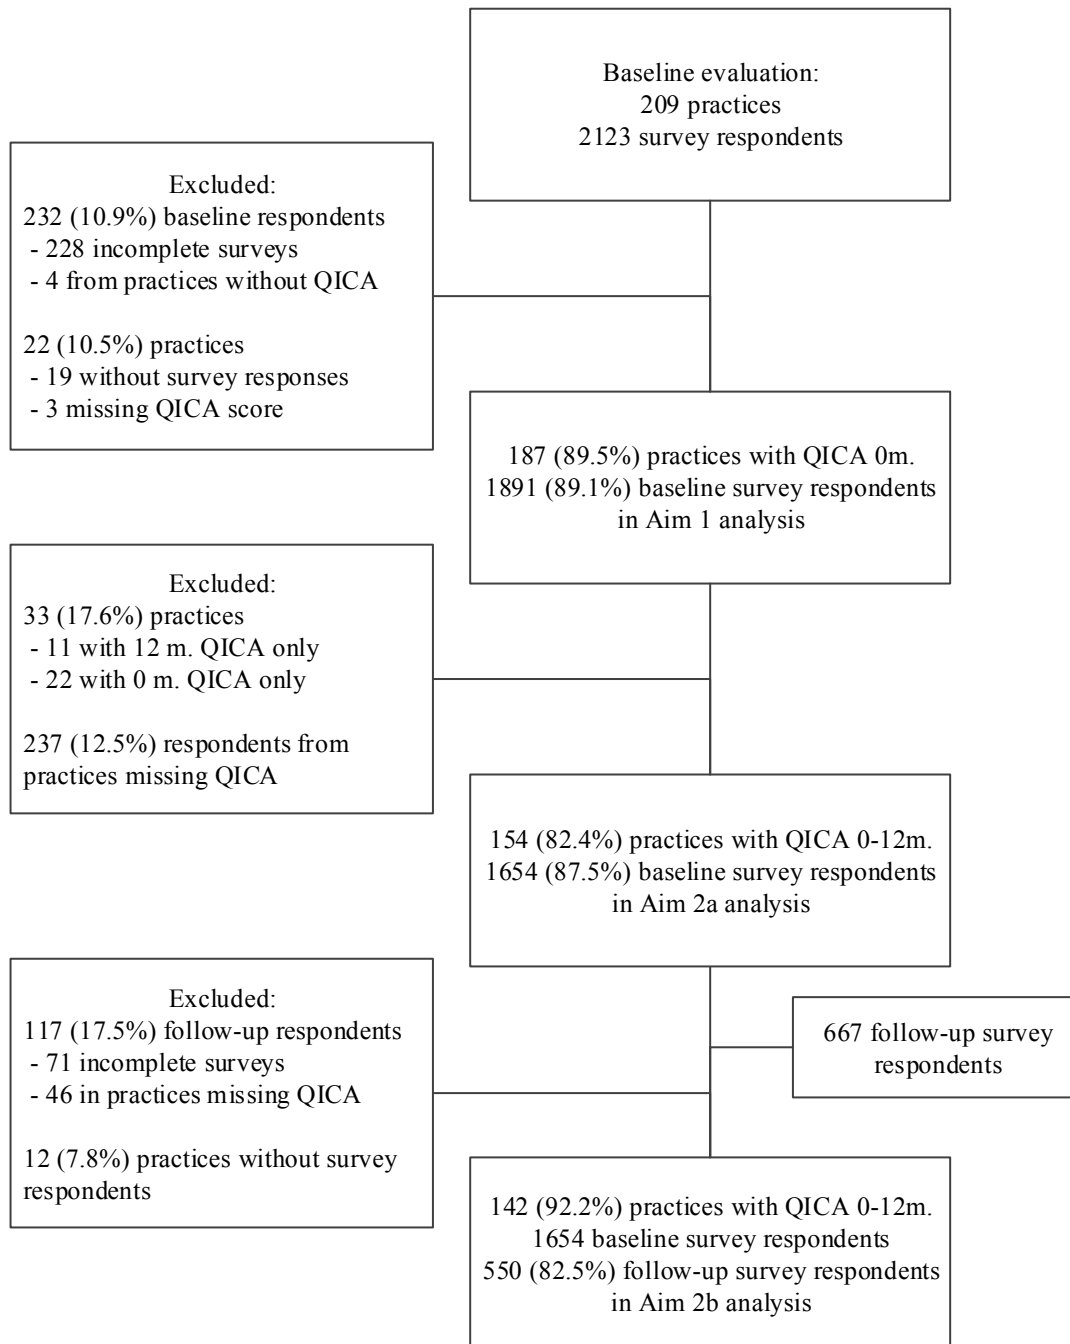

Supplement: NIHMS1561691-supplement-Supplemental_Digital_Content_eFigure_1.pdf [file NIHMS1561691-supplement-Supplemental_Digital_Content_eFigure_1.pdf]
